# Supplementary material
Source: PubMed Central journal article supplement (PMC8028595)

**Figure S1. Sequencing coverage of the 30 intra-cDNA and inter-cDNA replicates.** Sequencing coverage of the 98 ARTIC V3 panel amplicons for the 30 intra-cDNA and inter-cDNA replicates generated from five COVID-19-positive swab samples. Green bars represent the amplicons generated using the ARTIC original primer set, and orange bars show the amplicons generated using the alternative V3 primers.

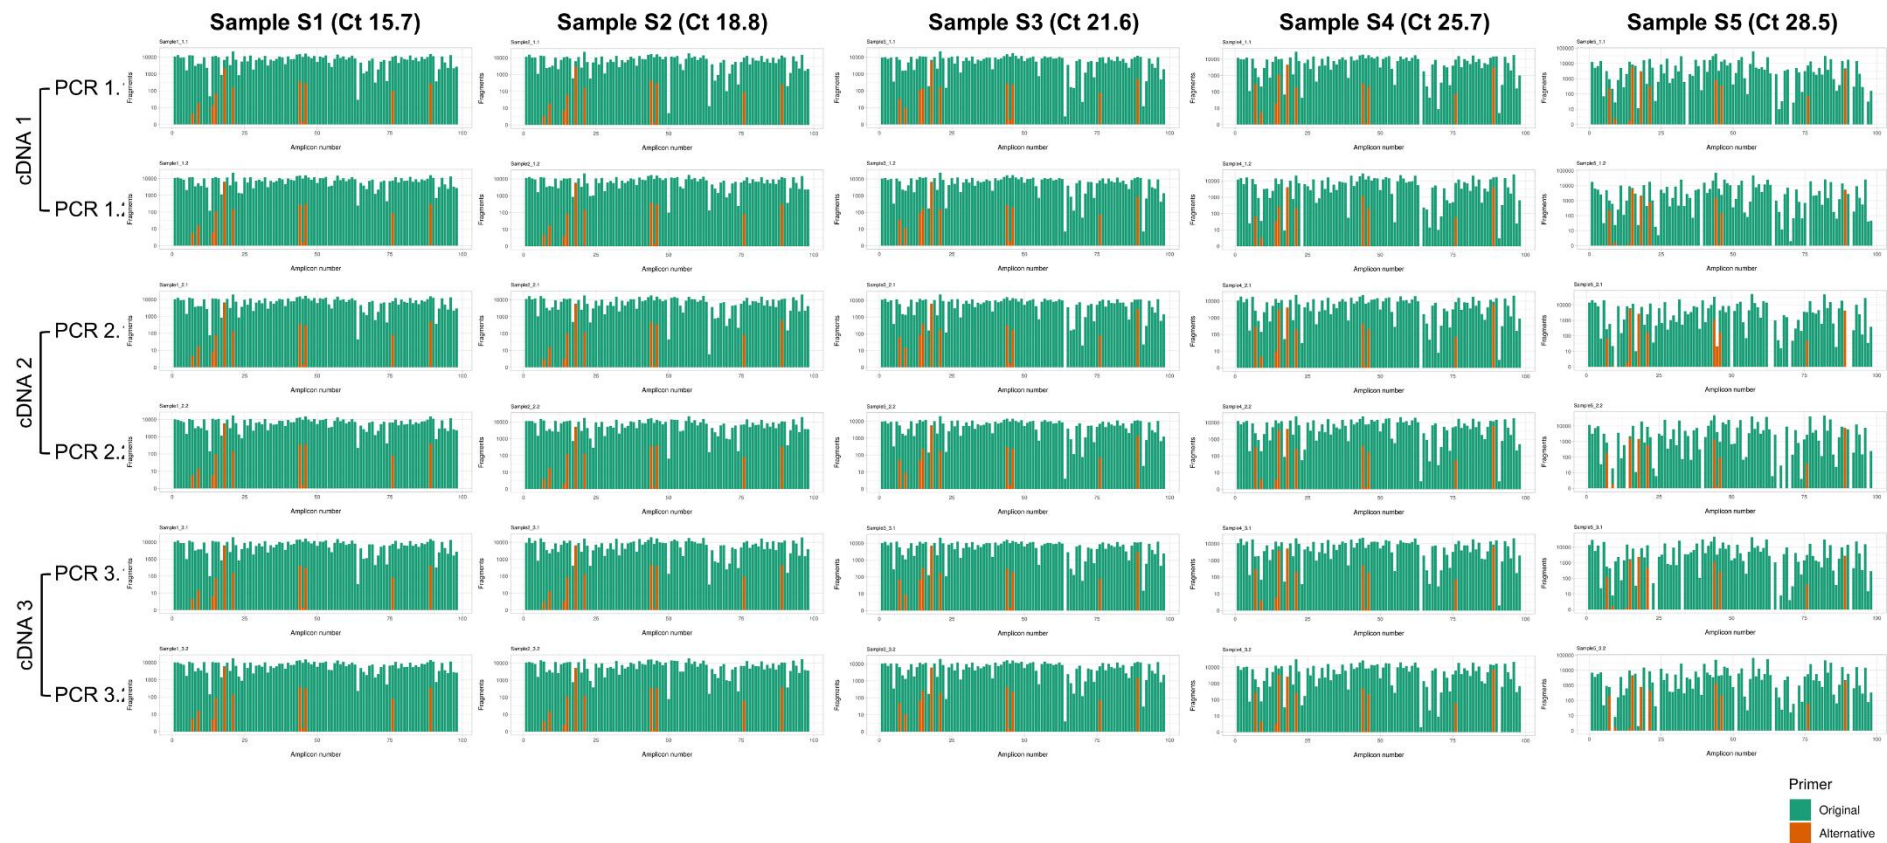

**Figure S2. Coverage and genotypability are similar when amplifying higher cDNA volumes or pooling distinct replicates. (A)** Ct frequency distribution of the 20 COVID-19-positive samples analyzed in (B) and (C). Ct values are rounded to the closest integer number. **(B)** Coverage and **(C)** genotypability when analyzing a single replicate generated from 10  $\mu$ L cDNA or after merging the sequencing results of two replicates generated from 5  $\mu$ L cDNA.

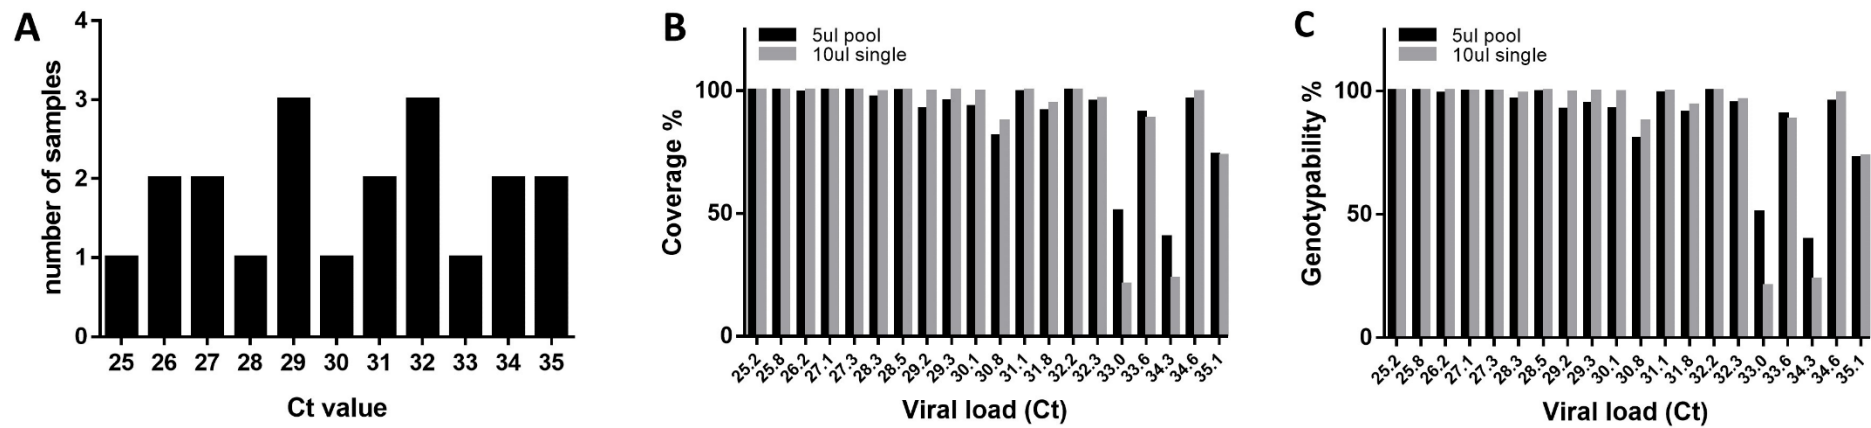

**Figure S3. Distribution of Ct values across a cohort of 170 COVID-19 swab samples.** The graph shows the frequency of COVID-19 swab samples showing a certain Ct (determined by RT-qPCR) in the cohort analyzed in Figure 5. Ct values are rounded to the closest integer number.

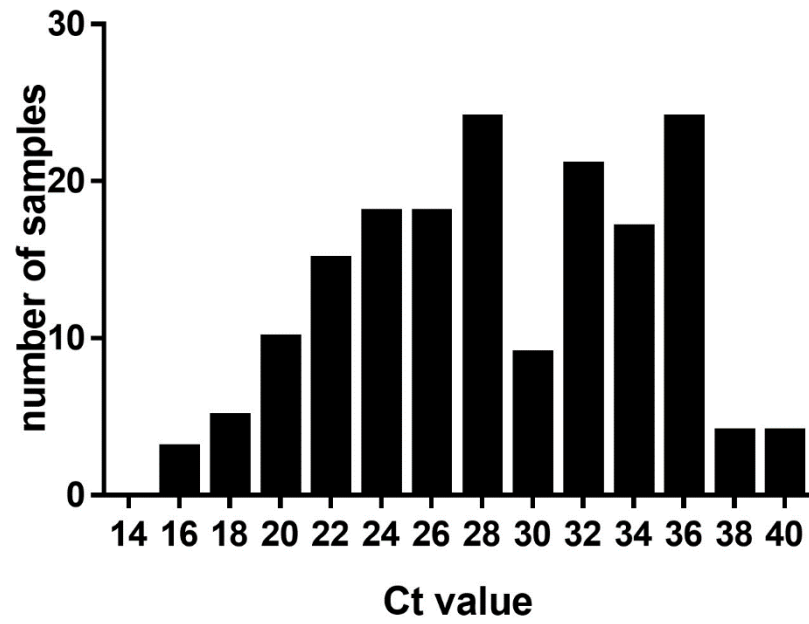

Supplement: mmc2.pdf [file mmc2.pdf]
